# Supplementary material for: Valorization of tannery fleshing waste into high energy biofuel through pyrolysis: process optimization and fuel properties analysis
Source: Royal Society of Chemistry journal article supplement (doi:10.1039/d5ra10133f), 2026-04-27
Supplement: d5ra10133f1.pdf [file d5ra10133f1.pdf]

**Supplementary Information (SI)**

**for**

**Valorization of Tannery Fleshing Waste into High-Energy Biofuel Through Pyrolysis:**

**Process Optimization and Fuel Properties Analysis**

Mohammad Al Shahriar Khan<sup>1</sup>, Manjushree Chowdhury<sup>1</sup>, Masud Hassan<sup>2</sup>, Amal Kanti Deb<sup>1</sup>

<sup>1</sup> *Institute of Leather Engineering and Technology, University of Dhaka, Dhaka -  
1000, Bangladesh.*

<sup>2</sup> *College of Resources and Environmental Engineering, Guizhou University,  
Guiyang, Guizhou, 550025, China.*

\*Corresponding author

E-mail address: debak.ilet@du.ac.bd (Amal Kanti Deb)

Orchid ID: <https://orcid.org/0000-0002-1465-0333>.

**Supplementary text 1:**

$$\text{HHV} = 0.3383 \times C + 1.443 \times H - 0.1804 \times O + 0.0942 \times S \dots\dots\dots\text{EqS1}$$

$$\text{LHV} = \text{HHV} - (2.442 \times 8.936 \times (H/100)) \dots\dots\dots\text{EqS2}$$

$$\frac{dW}{dT} = \frac{W_{i+1} - W_i}{T_{i+1} - T_i} \dots\dots\dots\text{EqS3}$$

Where  $W_i$  and  $W_{i+1}$  = Weight (%) of the sample at consecutive temperatures  $T_i$  and  $T_{i+1}$ , and  $dW/dT$  = the rate of mass loss per degree temperature, which forms the DTG curve.

$$\text{Specific gravity} = \frac{\text{Density of the biofuel}}{\text{Density of water}} \dots\dots\dots\text{EqS4}$$

$$\text{Acid value} = \frac{\text{Volume of KOH} \times \text{normality of KOH} \times 56.1}{\text{Weight of the biofuel sample}} \dots\dots\dots\text{EqS5}$$

**Table S1.** Statistical comparison of regression models (Linear, two-factor interaction (2FI), quadratic and cubic) for biofuel process optimization.

| Source                   | Sequential p-value | Lack of fit p-value | Adjusted R <sup>2</sup> | Predicted R <sup>2</sup> | Remarks   |
|--------------------------|--------------------|---------------------|-------------------------|--------------------------|-----------|
| Linear                   | 0.1511             | 0.0002              | 0.1391                  | -0.2572                  |           |
| 2FI                      | 0.3058             | 0.0002              | 0.1900                  | -2.6451                  |           |
| Cubic                    | 0.0647             |                     | 0.9906                  |                          | Aliased   |
| Quadratic                | < 0.0001           | 0.0647              | 0.9664                  | 0.8077                   | Suggested |
| Std. Dev.                | 1.8900             |                     |                         |                          |           |
| Mean                     | 38.1200            |                     |                         |                          |           |
| Coefficient of variation | 4.9500             |                     |                         |                          |           |
| R <sup>2</sup>           | 0.9823             |                     |                         |                          |           |
| Adequate precision       | 29.4692            |                     |                         |                          |           |

**Table S2.** Cost analysis of biofuel production from fleshing waste (Lab-scale basis).

| <b>Item</b>        | <b>Quantity</b> | <b>Total cost (USD)</b> | <b>Notes</b>          |
|--------------------|-----------------|-------------------------|-----------------------|
| Fleshing waste     | 200 g           | 0.00                    | Considered waste      |
| N <sub>2</sub> gas | 1 L             | 0.003                   | For inert environment |
| Electricity        | 0.5 unit        | 0.030                   | For heating to 555 °C |
| Transportation     |                 | 0.010                   |                       |
| Total direct cost  |                 | 0.043                   |                       |

Biofuel yield from 300 g fleshing waste =  $300 * 55.1 \% = 110.2 \text{ g} = 128.14 \text{ mL}$

Production cost per litre of biofuel =  $0.0043 * 1000 / 128.14 = 0.33 \text{ USD}$

The laboratory-scale cost of biofuel production from fleshing waste is significantly lower than commercial fossil-based fuels, indicating a high potential of the process. With strategic scale-up and utilization of valuable by-products such as biochar and syngas, the overall production cost could be significantly reduced.

**Table S3.** Compounds identified in GC–MS analysis of biofuel produced from fleshing waste.

\*MW = Molecular weight

| Retention time | Possible compound name                                                  | MW* | Chemical formula                                               | Area (%) |
|----------------|-------------------------------------------------------------------------|-----|----------------------------------------------------------------|----------|
| 6.16           | UREA, N-(2-METHYLCYCLOHEXYL)-N'-PHENYL                                  | 232 | C <sub>14</sub> H <sub>20</sub> ON <sub>2</sub>                | 0.607921 |
| 8.91           | 1R,2C,3T,4T-TETRAMETHYL-CYCLOHEXANE                                     | 140 | C <sub>10</sub> H <sub>20</sub>                                | 0.778242 |
| 11.81          | TRANS-2-METHYL-4-N-PENTYLTHIANE, S, S-DIOXIDE                           | 218 | C <sub>11</sub> H <sub>22</sub> O <sub>2</sub> S               | 0.807351 |
| 14.74          | TRANS-2-METHYL-4-N-BUTYLTHIANE, S, S-DIOXIDE                            | 204 | C <sub>10</sub> H <sub>20</sub> O <sub>2</sub> S               | 1.111013 |
| 17.61          | 1-NONANOL                                                               | 144 | C <sub>9</sub> H <sub>20</sub> O                               | 1.662163 |
| 20.37          | 2-AZETIDINONE, 3,3-DIPENTYL                                             | 211 | C <sub>13</sub> H <sub>25</sub> ON                             | 2.620058 |
| 22.92          | CYCLODODECYLAMINE                                                       | 183 | C <sub>12</sub> H <sub>25</sub> N                              | 1.741779 |
| 24.93          | CHLOROACETIC ACID, 10-UNDECENYL ESTER                                   | 246 | C <sub>13</sub> H <sub>23</sub> O <sub>2</sub> Cl              | 1.372146 |
| 25.42          | N-[4-CYCLOOCTYLAMINOBUTYL] AZIRIDINE                                    | 224 | C <sub>14</sub> H <sub>28</sub> N <sub>2</sub>                 | 3.587449 |
| 27.65          | 2H-PYRIDO[1,2F][1,6] DIAZACYCLOOCTADECIN-11(6H)-ONE, 10-(3-AMINOPROPYL) | 379 | C <sub>23</sub> H <sub>45</sub> ON <sub>3</sub>                | 1.022638 |
| 29.48          | CYANAMIDE, DI-2-PROPENYL                                                | 122 | C <sub>7</sub> H <sub>10</sub> N <sub>2</sub>                  | 1.485159 |
| 30.28          | DECAHYDRO-8A-ETHYL-1,1,4A,6-TETRAMETHYLNAPHTHALENE                      | 222 | C <sub>16</sub> H <sub>30</sub>                                | 11.57388 |
| 32.16          | DECAHYDRO-1,1,4A,5,6-PENTAMETHYLNAPHTHALENE                             | 208 | C <sub>15</sub> H <sub>28</sub>                                | 1.042181 |
| 33.78          | SILANE, CHLORODIETHYL(DODEC-9-YNYLOXY)                                  | 302 | C <sub>16</sub> H <sub>31</sub> OClSi                          | 2.075556 |
| 34.03          | 1-METHYL-2-PROPYL-PYRAZOLIUM BROMIDE                                    | 204 | C <sub>7</sub> H <sub>13</sub> N <sub>2</sub> Br               | 10.40997 |
| 35.92          | 2-PENTADECANONE                                                         | 226 | C <sub>15</sub> H <sub>30</sub> O                              | 3.438095 |
| 39.26          | Z-23-DOTRIACONTEN-2-ONE                                                 | 462 | C <sub>32</sub> H <sub>62</sub> O                              | 3.062615 |
| 39.7           | [1-(DIETHYLAMINO)ETHYLIDENIMINO] SULFUR PENTAFLUORIDE                   | 240 | C <sub>6</sub> H <sub>13</sub> N <sub>2</sub> F <sub>5</sub> S | 1.933925 |
| 43.04          | (2R,6R)-2-METHYL-6-NONYLPIPERIDIN-4-ONE                                 | 239 | C <sub>15</sub> H <sub>29</sub> ON                             | 0.816927 |
| 45.38          | 2,5-METHANOFURO[3,2-B] PYRIDINE, OCTAHYDRO                              | 139 | C <sub>8</sub> H <sub>13</sub> ON                              | 0.696782 |
| 47.71          | 2(1H)-PYRIDINONE, 4-HYDROXY-6-METHYL-                                   | 125 | C <sub>6</sub> H <sub>7</sub> O <sub>2</sub> N                 | 0.923240 |
| 52.13          | 2,5-METHANOFURO[3,2-B] PYRIDINE, OCTAHYDRO                              | 139 | C <sub>8</sub> H <sub>13</sub> ON                              | 0.656114 |

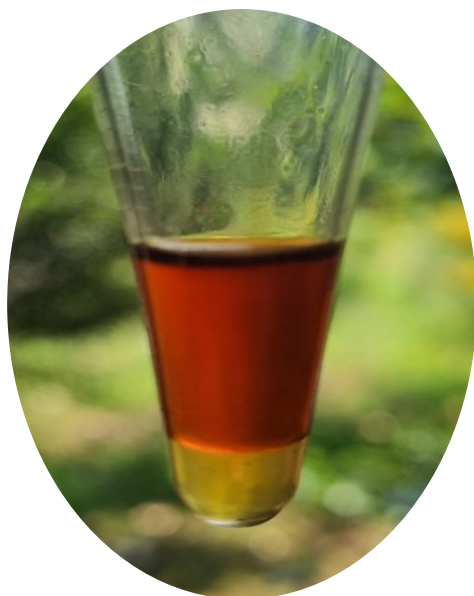

**Fig. S1.** Purified biofuel fraction, isolated through fractional distillation based on boiling point differences (40 – 60 °C).

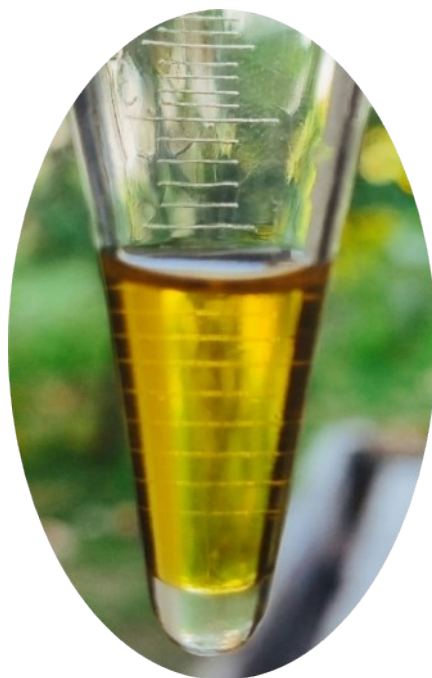

**Fig. S2.** Purified biofuel fraction, isolated through fractional distillation based on boiling point differences (60 – 80 °C).

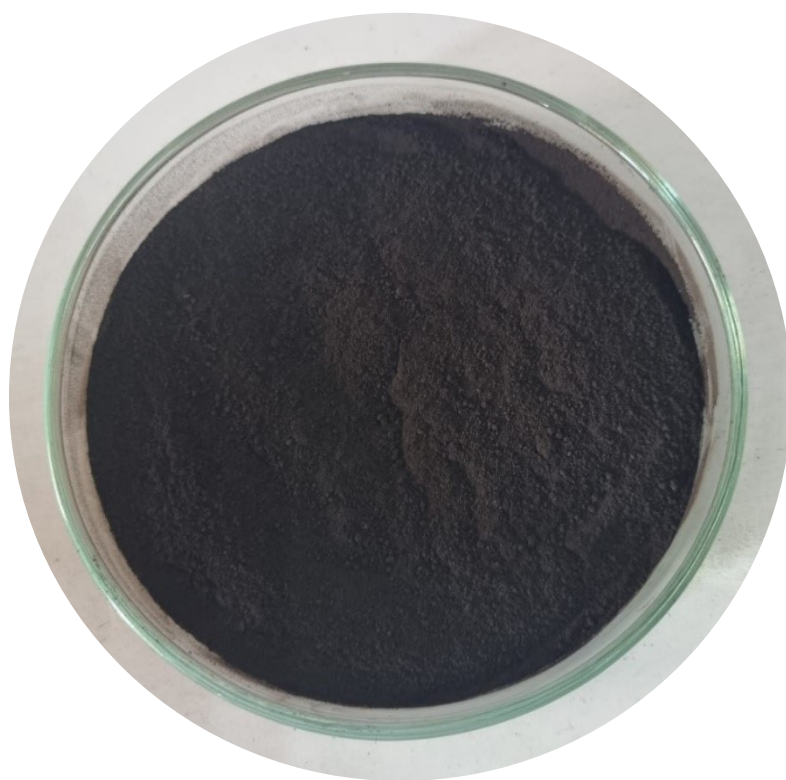

**Fig. S3.** Biochar, synthesized at 550 °C via pyrolysis of fleshing waste.
